# Supplementary material for: Genome of the house fly, Musca domestica L., a global vector of diseases with adaptations to a septic environment
Source: PubMed Central journal article supplement (PMC4195910; doi:10.1186/s13059-014-0466-3), 2014-10-14
Supplement: 13059_2014_466_MOESM4_ESM.pdf [file 13059_2014_466_MOESM4_ESM.pdf]

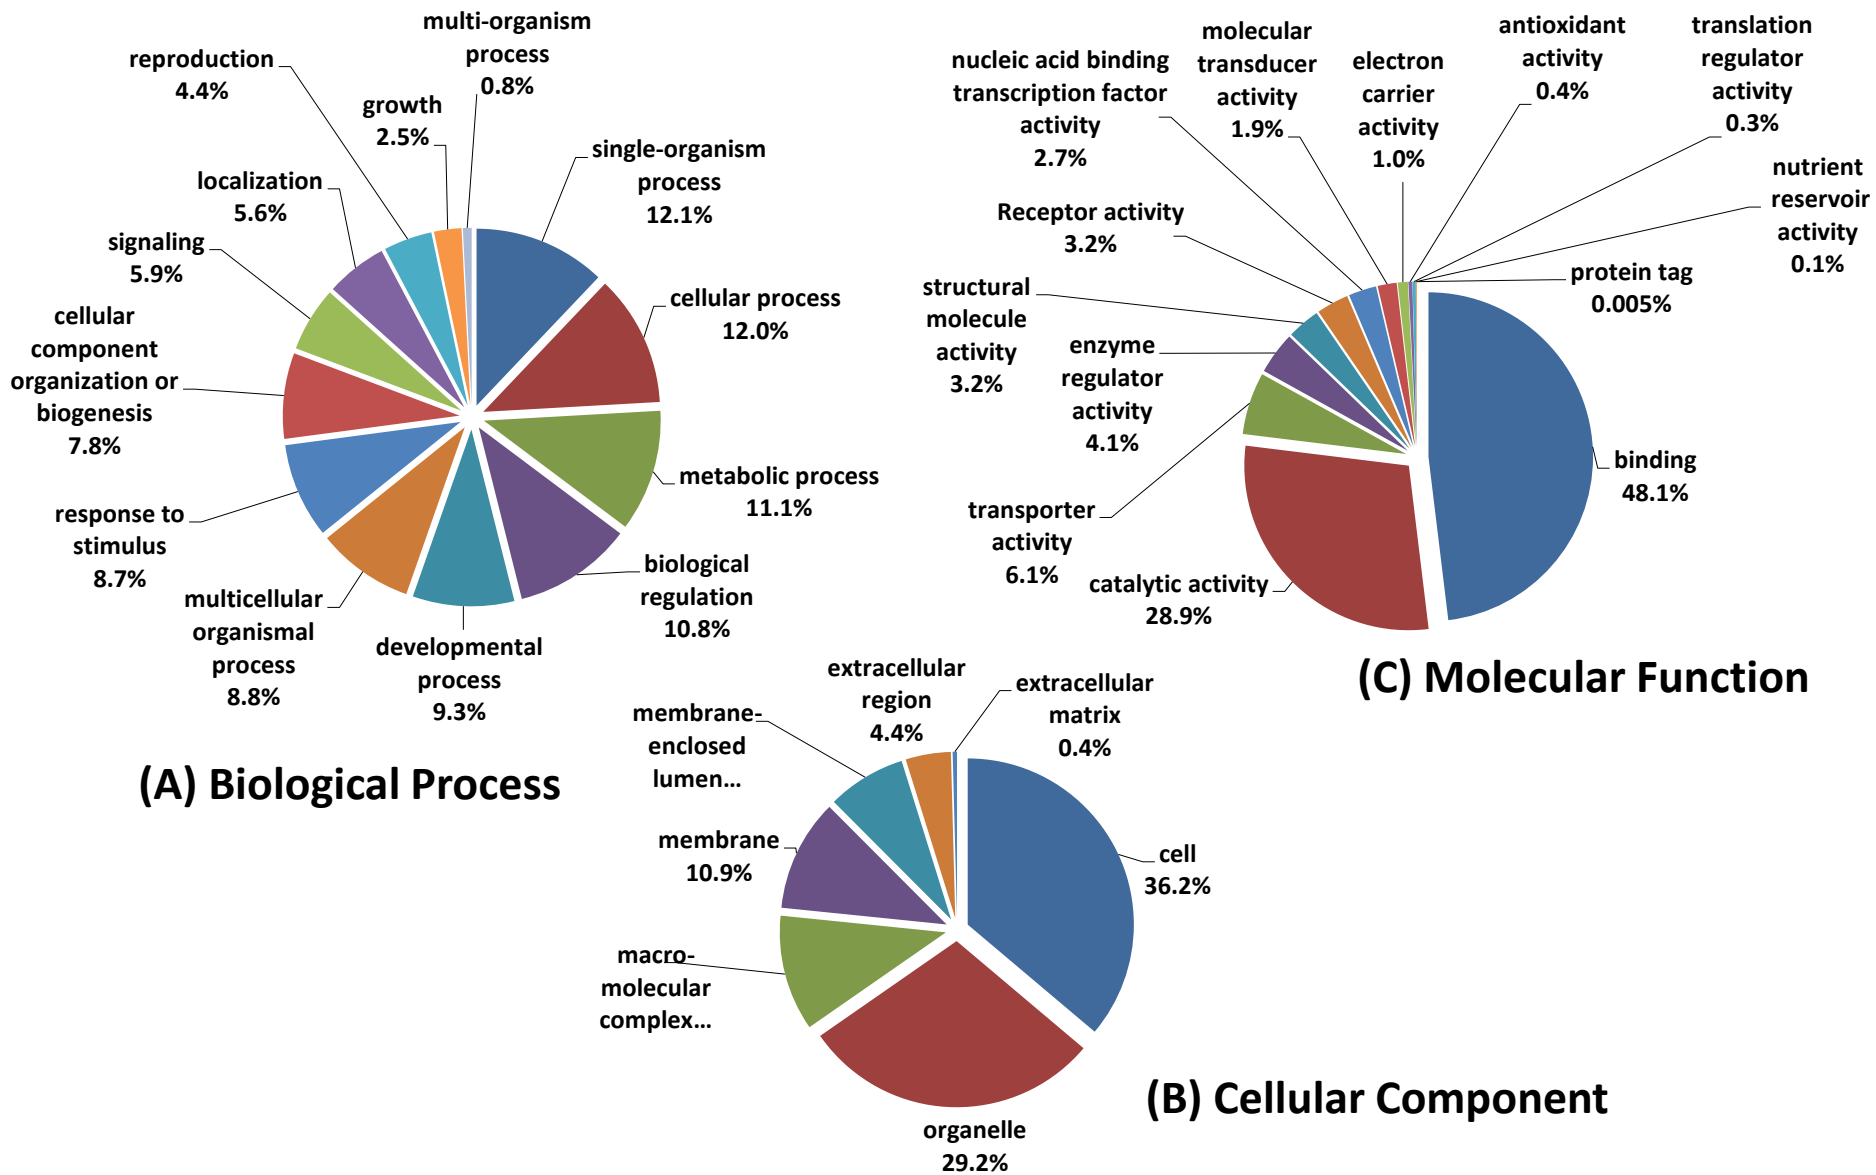

**Supplementa Figure 1.** Classification of *Musca domestica* genes based on Predicted Gene Ontology (GO) terms. (A) Biological Process, (B) Cellular Components, and (C) Molecular Function. GO terms were determined using Blast2GO with an e-value cutoff of  $1e^{-5}$  and sorted based on level 2 classifications.
